# Supplementary material
Source: PubMed Central journal article supplement (PMC3540102)
Supplement: NIHMS2545-supplement-Video_captions.pdf [file NIHMS2545-supplement-Video_captions.pdf]

## Supplemental Material

Robinovitch, S.N., Feldman, F., Yang, Y., Schonnop, R., Leung, P.M., Sarraf, T., Sims-Gould, J., and Loughin, M.: Video capture of the circumstances of falls in elderly people residing in long-term care: an observational study. *The Lancet*, Epub date: October 17, 2012. <http://www.sciencedirect.com/science/article/pii/S014067361261263X>

**Video A (“A\_incorrect\_shifting1\_SFU\_TIPS.mp4”)** Incorrect weight shifting while standing and turning. While initiating a turn, this woman rotates her walker and upper body 180 degrees, while her feet remain stationary (typical of Parkinson-like freezing). Despite eventual steps, a backward fall ensues.

**Video B (“B\_incorrect\_shifting3\_SFU\_TIPS.mp4”)** Incorrect weight shifting while walking forward. While stepping around his dog, this man establishes too narrow a base of support, causing a sideways fall.

**Video C (“C\_trip1\_SFU\_TIPS.mp4”)** Trip while walking and turning. While playing ball, this man initiates a turn by crossing his left leg in front of his right. He loses balance during the next step, after the toe of his right foot collides with his left heel, resulting in a backward fall.

**Video D (“D\_trip2\_SFU\_TIPS.mp4”)** Trip while walking forward. This woman seems to attempt to steer around the foot of a lifting device, but trips on the obstacle.

**Video E (“E\_loss-of-support1\_SFU\_TIPS.mp4”)** Loss of support with external object while sitting down. Note that the wheelchair rolls backward on contact, and is unable to provide the support necessary to complete the transfer.
